# Supplementary material for: A role for Rad5 in ribonucleoside monophosphate (rNMP) tolerance
Source: Life Sci Alliance. 2021 Aug 18;4(10):e202000966. doi: 10.26508/lsa.202000966 (PMC8380674; doi:10.26508/lsa.202000966)
Supplement: Supplementary file 1 [file LSA-2020-00966_TableS1.xlsx]

## Sheet: Doubling time
Raw data		W303 RAD5+	delta rad5 his	delta rad5 trp	delta rad5 delta rnh1	delta rad5 delta rnh2	delta rnh1 delta rnh2	delta rad5 delta rnh1 delta rnh2	RED	DEAD	RED delta rad5	Dead delta rad5	RED delta top1	RED delta rad5 delta top1
1st repeat	0hr	0.145	0.165	0.168	0.165	0.226	0.174	0.161	0.171	0.181	0.158	0.168	0.15	0.122
	2hr	0.272	0.177	0.243	0.19	0.335	0.223	0.226	0.342	0.339	0.233	0.332	0.32	0.211
	4hr	0.688	0.44	0.488	0.596	0.455	0.565	0.299	0.904	0.77	0.259	0.452	0.611	0.256
	6hr	1.56	0.919	1.271	1.255	1.292	1.115	0.642	1.792	1.3	0.538	0.9	1.034	0.373
2nd Repeat	0hr	0.155	0.176	0.171	0.175	0.231	0.162	0.226	0.204	0.142	0.123	0.155	0.16	0.123
	2hr	0.26	0.256	0.238	0.261	0.297	0.24	0.249	0.37	0.346	0.219	0.36	0.23	0.156
	4hr	0.624	0.373	0.493	0.56	0.454	0.432	0.329	0.835	0.788	0.3	0.474	0.438	0.242
	6hr	1.485	1.33	1.163	1.241	1.17	1.079	0.669	1.849	1.5	0.483	1.01	1.042	0.347
3rd Repeat	0hr	0.153	0.154	0.131	0.176	0.232	0.188	0.203	0.21	0.163	0.144	0.196	0.156	0.117
	2hr	0.225	0.243	0.161	0.251	0.304	0.254	0.239	0.154	0.294	0.208	0.257	0.335	0.168
	4hr	0.732	0.53	0.374	0.395	0.632	0.544	0.309	0.83	0.681	0.335	0.507	0.392	0.194
	6hr	1.769	1.256	1.16	1.227	1.202	1.169	0.685	1.69	1.482	0.388	1.016	0.99	0.372
Normalization
1st repeat	0hr	1	1	1	1	1	1	1	1	1	1	1	1	1
	2hr	1.87586	1.07273	1.44643	1.15152	1.4823	1.28161	1.40373	2	1.87293	1.47468	1.97619	2.13333	1.72951
	4hr	4.74483	2.66667	2.90476	3.61212	2.01327	3.24713	1.85714	5.28655	4.25414	1.63924	2.69048	4.07333	2.09836
	6hr	10.7586	5.5697	7.56548	7.60606	5.71681	6.40805	3.98758	10.4795	7.18232	3.40506	5.35714	6.89333	3.05738
2nd Repeat	0hr	1	1	1	1	1	1	1	1	1	1	1	1	1
	2hr	1.67742	1.45455	1.39181	1.49143	1.28571	1.48148	1.10177	1.81373	2.43662	1.78049	2.32258	1.4375	1.26829
	4hr	4.02581	2.11932	2.88304	3.2	1.96537	2.66667	1.45575	4.09314	5.5493	2.43902	3.05806	2.7375	1.96748
	6hr	9.58065	7.55682	6.80117	7.09143	5.06494	6.66049	2.96018	9.06373	10.5634	3.92683	6.51613	6.5125	2.82114
3rd Repeat	0hr	1	1	1	1	1	1	1	1	1	1	1	1	1
	2hr	1.47059	1.57792	1.22901	1.42614	1.31034	1.35106	1.17734	0.733333	1.80368	1.44444	1.31122	2.14744	1.4359
	4hr	4.78431	3.44156	2.85496	2.24432	2.72414	2.89362	1.52217	3.95238	4.17791	2.32639	2.58673	2.51282	1.65812
	6hr	11.5621	8.15584	8.85496	6.97159	5.18103	6.21809	3.37438	8.04762	9.09202	2.69444	5.18367	6.34615	3.17949
Average		w303 Rad5+	delta rad5 his	delta rad5 trp	delta rad5 delta rnh1	delta rad5 delta rnh2	delta rnh1 delta rnh2	delta rad5 delta rnh1 delta rnh2	RED	DEAD	RED delta rad5	Dead delta rad5	RED delta top1	RED delta rad5 delta top1
	0hr	1	1	1	1	1	1	1	1	1	1	1	1	1
	2hr	1.67462	1.3684	1.35575	1.35636	1.35945	1.37138	1.22761	1.51569	2.03774	1.56654	1.87	1.90609	1.4779
	4hr	4.51832	2.74251	2.88092	3.01881	2.23426	2.9358	1.61169	4.44402	4.66045	2.13488	2.77843	3.10788	1.90799
	6hr	10.6338	7.09412	7.74054	7.22303	5.32093	6.42887	3.44071	9.19696	8.94591	3.34211	5.68565	6.584	3.01933
SD	0hr	0	0	0	0	0	0	0	0	0	0	0	0	0
	2hr	0.115387	0.200261	0.0456547	0.171146	0.0993103	0.100108	0.151674	0.244297	0.289832	0.156912	0.236676	0.354824	0.230926
	4hr	0.367619	0.340029	0.013195	0.304052	0.14343	0.290485	0.202352	0.613352	0.662388	0.403695	0.191944	0.689653	0.0973923
	6hr	0.647085	1.03976	0.499536	0.267357	0.328432	0.140126	0.514057	0.781799	1.69106	0.320961	0.597336	0.202417	0.126845
